# Supplementary material for: A comprehensive characterization of chronic norovirus infection in immunodeficient hosts
Source: PubMed Central journal article supplement (PMC6843911; doi:10.1016/j.jaci.2019.07.036), 2019-11

### A CD19+ B cells

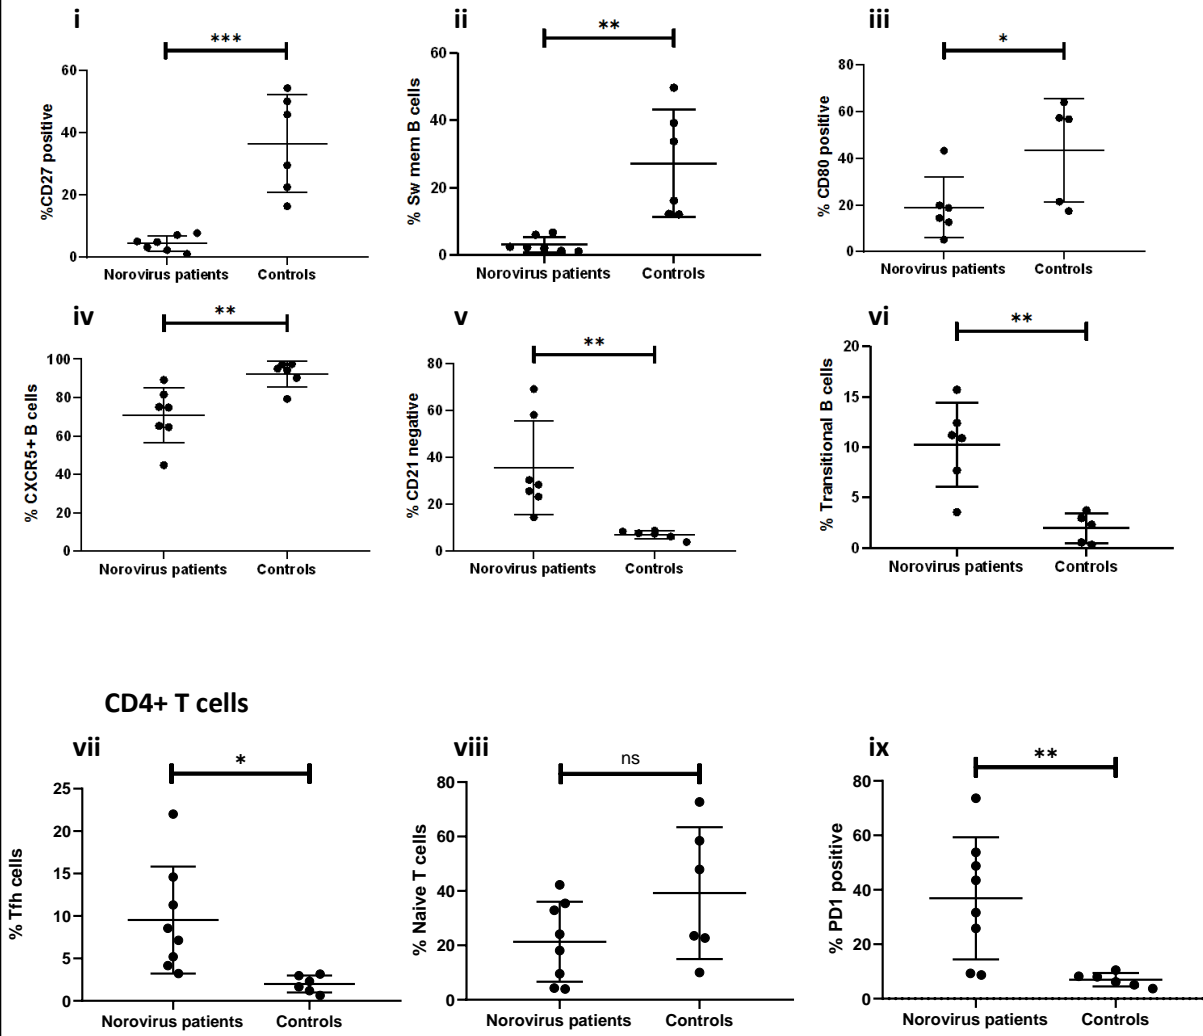

### B CD19+ B cells

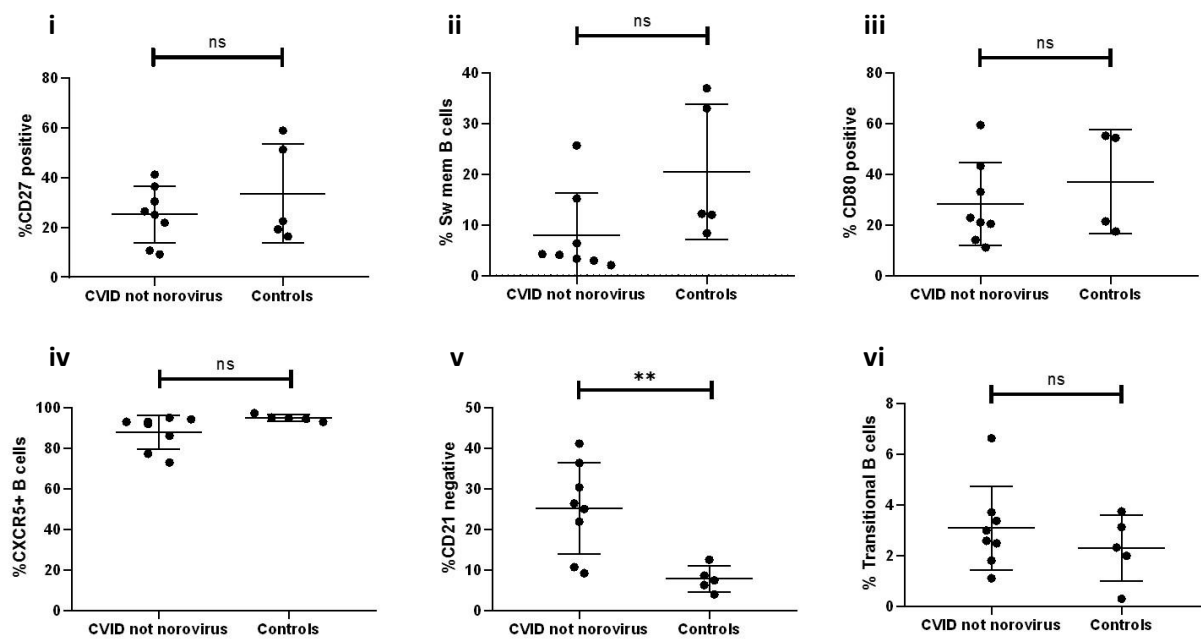

Supplement: mmc2.pdf [file mmc2.pdf]
